# Supplementary material for: Influence of aqueous solutions of 2-(tetrafluoro(trifluoromethyl)-λ6-sulfanyl-ethan-1-ol (CF3SF4–ethanol) on the stabilization of the secondary structure of melittin: comparison with aqueous trifluoroethanol using molecular dynamics simulations and circular dichroism experiments
Source: Royal Society of Chemistry journal article supplement (doi:10.1039/d4cp02654c), 2024-12-28
Supplement: d4cp02654c1.pdf [file d4cp02654c1.pdf]

## Supporting Information

**Title:** Influence of aqueous solutions of 2-(tetrafluoro(trifluoromethyl)- $\lambda^6$ -sulfanyl-ethan-1-ol (CF<sub>3</sub>SF<sub>4</sub>-ethanol) on the stabilization of the secondary structure of melittin: Comparison with aqueous trifluoroethanol using molecular dynamics simulations and circular dichroism experiments.

Samadrita Biswas<sup>1</sup>, Nilavra Pathak<sup>2</sup>, Leah Sutherland<sup>1</sup>, Alan Chen<sup>1,3\*</sup>, John T. Welch<sup>1\*</sup>

<sup>1</sup>Department of Chemistry, University at Albany, State University of New York, 1400 Washington Ave, Albany, NY 12222, USA

<sup>2</sup>Marketing Data Science, Expedia Group, 350 Fifth Ave, 7220, New York 10118

<sup>3</sup>RNA Institute, University at Albany, State University of New York, 1400 Washington Ave, Albany, NY 12222, USA

Alan A. Chen – [achen6@albany.edu](mailto:achen6@albany.edu)

John T. Welch – [jwelch@albany.edu](mailto:jwelch@albany.edu)

\* Corresponding author

## Table of Contents

|                                                                                                                                                                                                                                                                                                                                                                                                                                                                                                      |     |
|------------------------------------------------------------------------------------------------------------------------------------------------------------------------------------------------------------------------------------------------------------------------------------------------------------------------------------------------------------------------------------------------------------------------------------------------------------------------------------------------------|-----|
| Figure S1. Secondary structure count for melittin (MLT) with respect of simulation time in CF <sub>3</sub> SF <sub>4</sub> -ethanol different concentrations.                                                                                                                                                                                                                                                                                                                                        | S4  |
| Figure S2. Secondary structure count for melittin (RMLT) with respect of simulation time in CF <sub>3</sub> SF <sub>4</sub> -ethanol for different concentrations.                                                                                                                                                                                                                                                                                                                                   | S5  |
| Figure S3. Secondary structure count for melittin (MLT) with respect of simulation time in TFE different concentrations.                                                                                                                                                                                                                                                                                                                                                                             | S6  |
| Figure S4. Secondary structure count for melittin (RMLT) with respect of simulation time in TFE.                                                                                                                                                                                                                                                                                                                                                                                                     | S7  |
| Figure S5. Representative snapshot of simulation within 0.6 nm from the melittin (MLT) backbone in CF <sub>3</sub> SF <sub>4</sub> -ethanol-water system. PDB: 2MLT of melittin at 0.5 % (a), 1 % (c), 2.5 % (e), 4.5 % (g), and 6 % (i) of CF <sub>3</sub> SF <sub>4</sub> -ethanol-water system at the beginning of simulation. $\alpha$ -helix of melittin after 50 ns simulation in 0.5 % (b), 1 % (d), 2.5 % (f), 4.5 % (h), and 6 % (j) CF <sub>3</sub> SF <sub>4</sub> -ethanol-water system. | S8  |
| Figure S6. Representative snapshot of simulation within 0.6 nm from the melittin (MLT) backbone in TFE-water system. PDB: 2MLT of melittin at 8 % (a), 10 % (c), 20 % (e), and 30 % (g) TFE-water system at the beginning of simulation. $\alpha$ -helix of melittin after 50 ns simulation in 8 % (b), 10 % (d), 20 % (f), and 30 % (h) TFE-water system.                                                                                                                                           | S9  |
| Figure S7. Representative snapshot of simulation within a distance of 0.6 nm from the melittin (RMLT) backbone in CF <sub>3</sub> SF <sub>4</sub> -ethanol-water system. Random coil structure of melittin at the beginning of simulation at 0.5 % (a) , 2.5 % (c) , 4.5 % (e) , and 6 %.                                                                                                                                                                                                            | S10 |
| Figure S8. Representative snapshot of simulation within 0.6 nm from the melittin (RMLT) backbone in TFE-water system. Random coil structure of melittin at 10 % (a), 20 % (c), and 30 % (e) TFE-water system at the beginning of simulation. $\alpha$ -helix of melittin after 50 ns simulation in 10 % (b), 20 % (d) and 30 % (f) TFE-water system.                                                                                                                                                 | S11 |
| Figure S9. Backbone RMSD with respect to the initial simulated structure RMLT in 1%, 8% CF <sub>3</sub> SF <sub>4</sub> -ethanol-water and 8% and 40% TFE-water system for 50 ns simulation time.                                                                                                                                                                                                                                                                                                    | S12 |
| Figure S10. Backbone RMSD with respect to the initial structure of simulation of melittin (MLT) in CF <sub>3</sub> SF <sub>4</sub> -ethanol for different concentrations.                                                                                                                                                                                                                                                                                                                            | S13 |
| Figure S11. Backbone RMSD with respect to the initial structure of simulation of melittin (RMLT) in CF <sub>3</sub> SF <sub>4</sub> -ethanol for different concentrations.                                                                                                                                                                                                                                                                                                                           | S14 |
| Figure S12. Backbone RMSD with respect to the initial structure of simulation of melittin (MLT) in TFE for different concentrations.                                                                                                                                                                                                                                                                                                                                                                 | S15 |
| Figure S13. Backbone RMSD with respect to the initial structure of simulation of melittin (RMLT) in TFE for different concentrations.                                                                                                                                                                                                                                                                                                                                                                | S16 |
| Figure S14. Folding of RMLT in 8% CF <sub>3</sub> SF <sub>4</sub> -ethanol from 50 ns simulation.                                                                                                                                                                                                                                                                                                                                                                                                    | S17 |

|                                                                                                                                                                                       |     |
|---------------------------------------------------------------------------------------------------------------------------------------------------------------------------------------|-----|
| Figure S15. Backbone RMSF with respect to the structure RMLT in 1%, 8% CF <sub>3</sub> SF <sub>4</sub> -ethanol-water and 8% and 40% TFE-water system with respect to residue number. | S18 |
| Figure S16. Backbone RMSF with respect to the initial structure of simulation of melittin (MLT) in, CF <sub>3</sub> SF <sub>4</sub> -ethanol for different concentrations.            | S19 |
| Figure S17. Backbone RMSF with respect to the initial structure of simulation of melittin (RMLT) in CF <sub>3</sub> SF <sub>4</sub> -ethanol for different concentrations.            | S20 |
| Figure S18. Backbone RMSF with respect to the initial structure of simulation of melittin (MLT) in TFE for different concentrations.                                                  | S21 |
| Figure S19. Backbone RMSF with respect to the initial structure of simulation of melittin (RMLT) in TFE for different concentrations.                                                 | S22 |
| Figure S20. Helicity per residue with respect to % of time of melittin (MLT) in CF <sub>3</sub> SF <sub>4</sub> -ethanol for different concentrations.                                | S23 |
| Figure S21. Helicity per residue with respect to % of time of melittin (RMLT) in CF <sub>3</sub> SF <sub>4</sub> -ethanol for different concentrations.                               | S24 |
| Figure S22. Helicity per residue with respect to % of time of melittin (MLT) in TFE for different concentrations.                                                                     | S25 |
| Figure S23. Helicity per residue with respect to % of time of melittin (RMLT) in TFE for different concentrations.                                                                    | S26 |
| Figure S24. Intermolecular hydrogen bonding interactions between the alcohols and the peptide over the period of the simulations.                                                     | S27 |

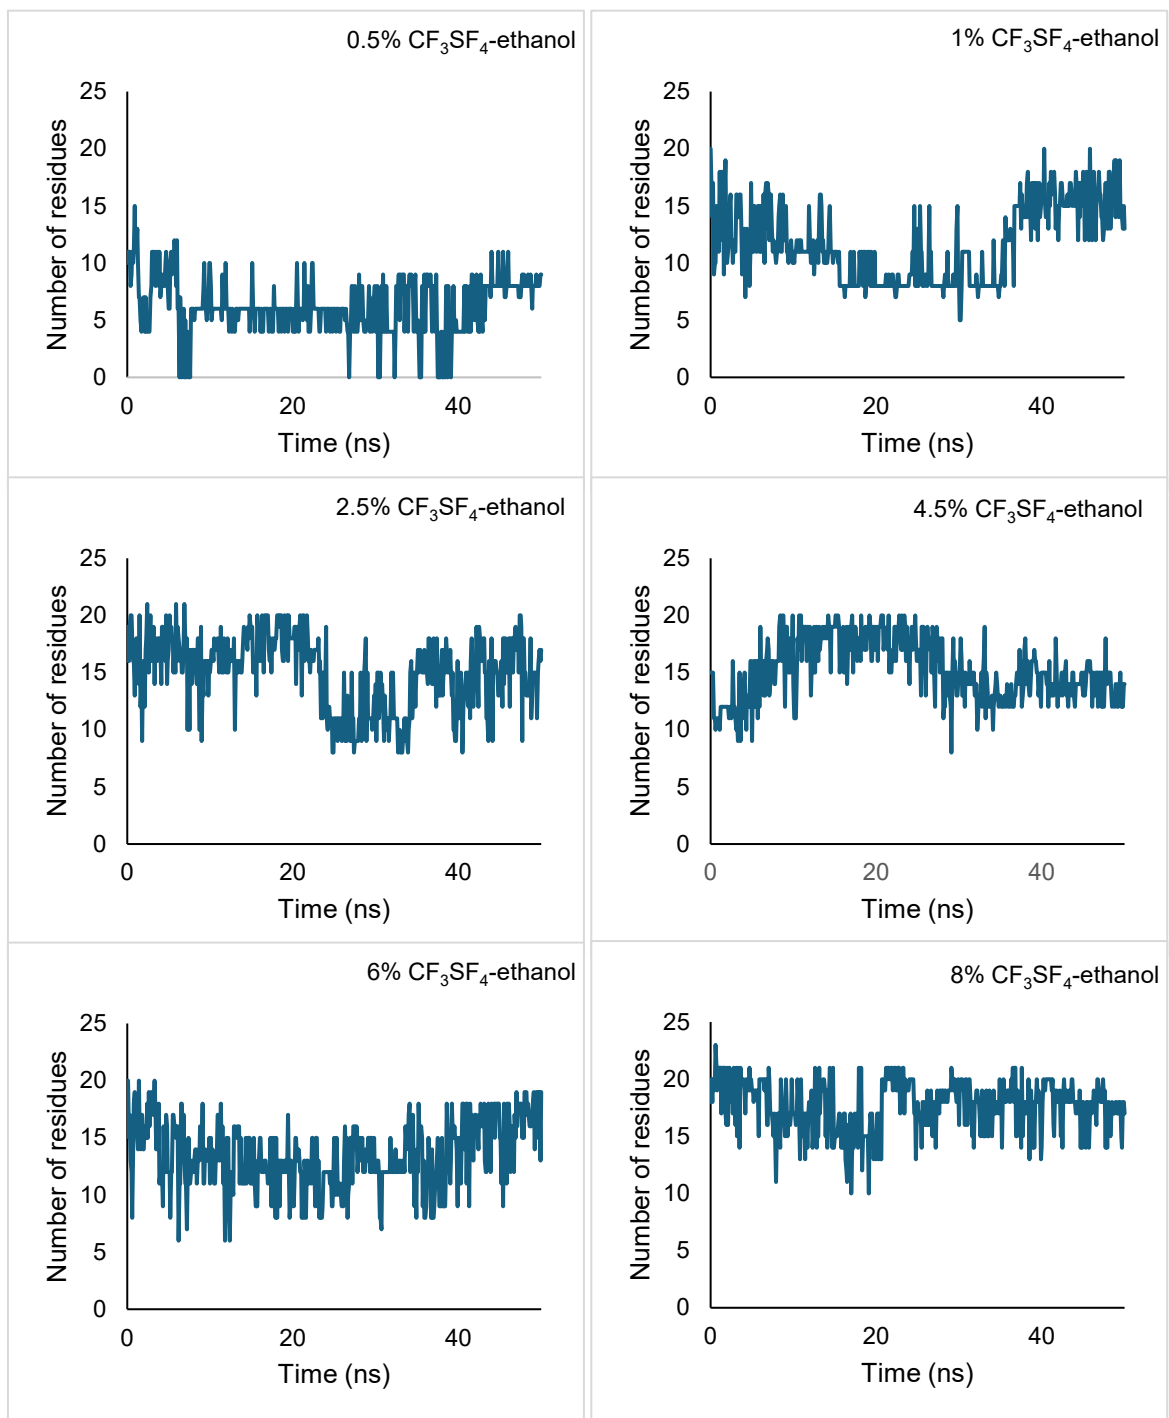

Figure S1. Secondary structure count for melittin (MLT) with respect of simulation time in  $\text{CF}_3\text{SF}_4$ -ethanol different concentrations.

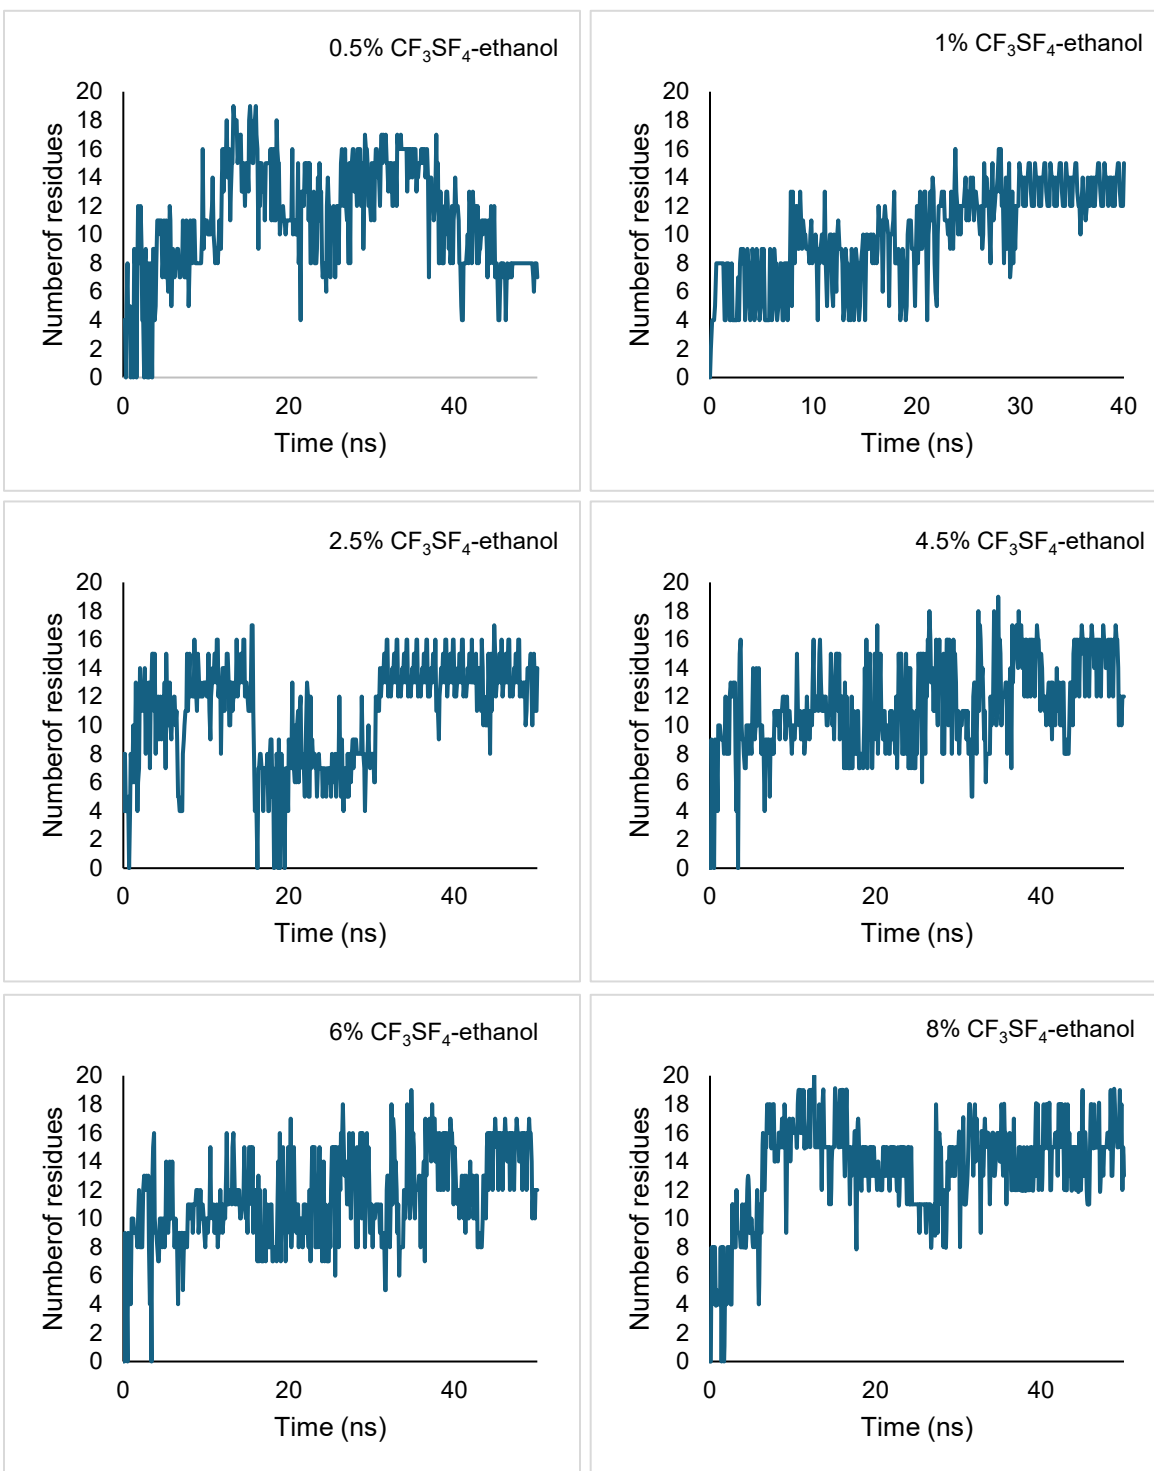

Figure S2. Secondary structure count for melittin (RMLT) with respect of simulation time in  $\text{CF}_3\text{SF}_4$ -ethanol for different concentrations.

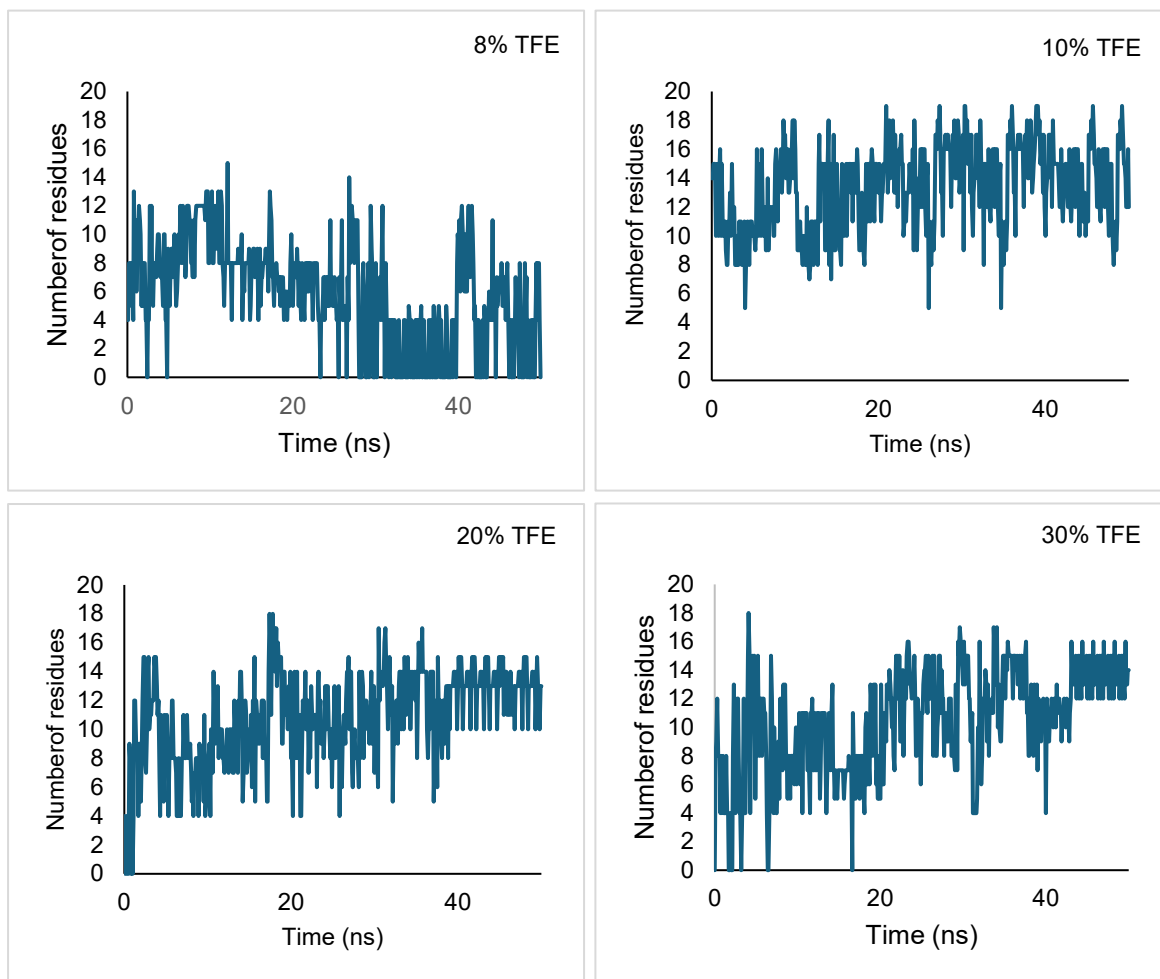

Figure S3. Secondary structure count for melittin (MLT) with respect of simulation time in TFE different concentrations.

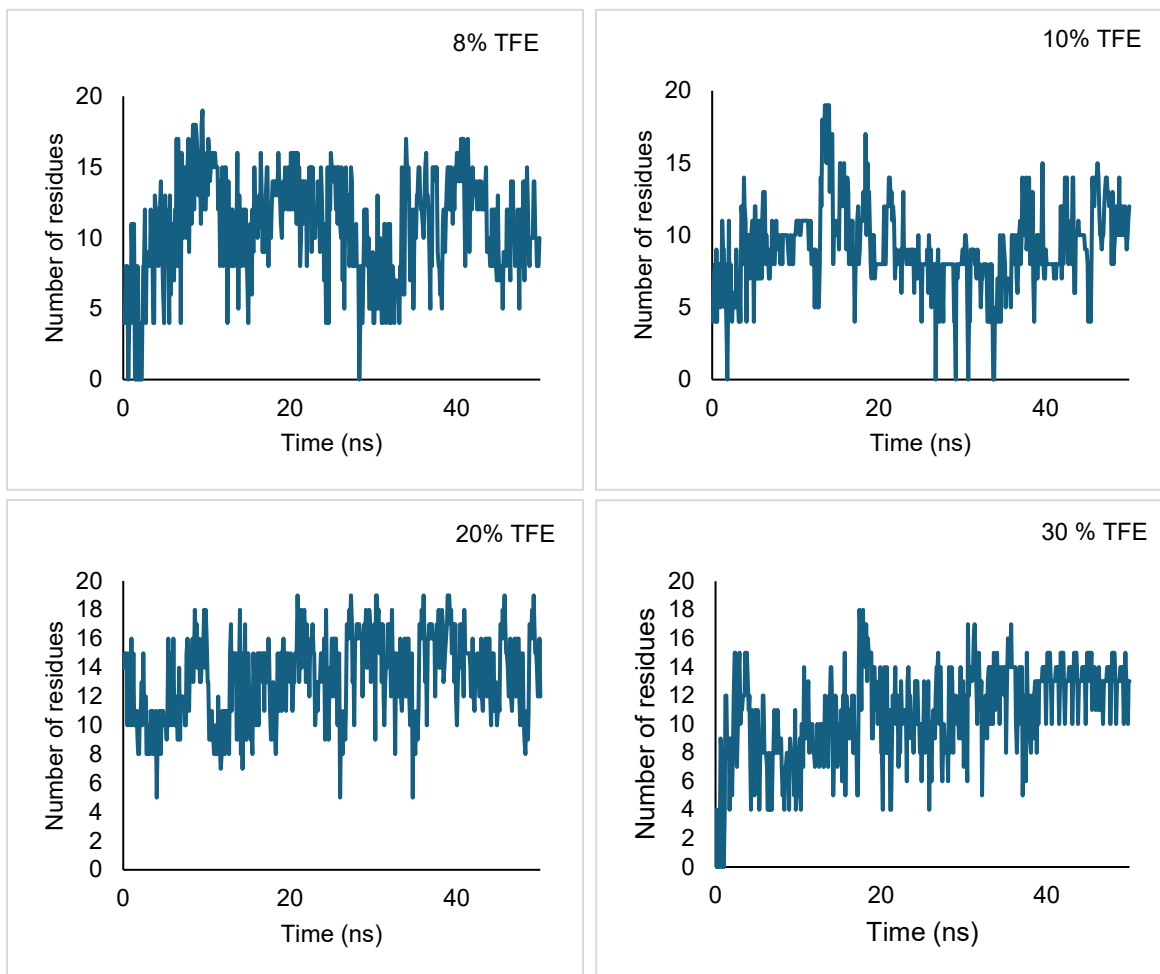

Figure S4. Secondary structure count for melittin (RMLT) with respect of simulation time in TFE.

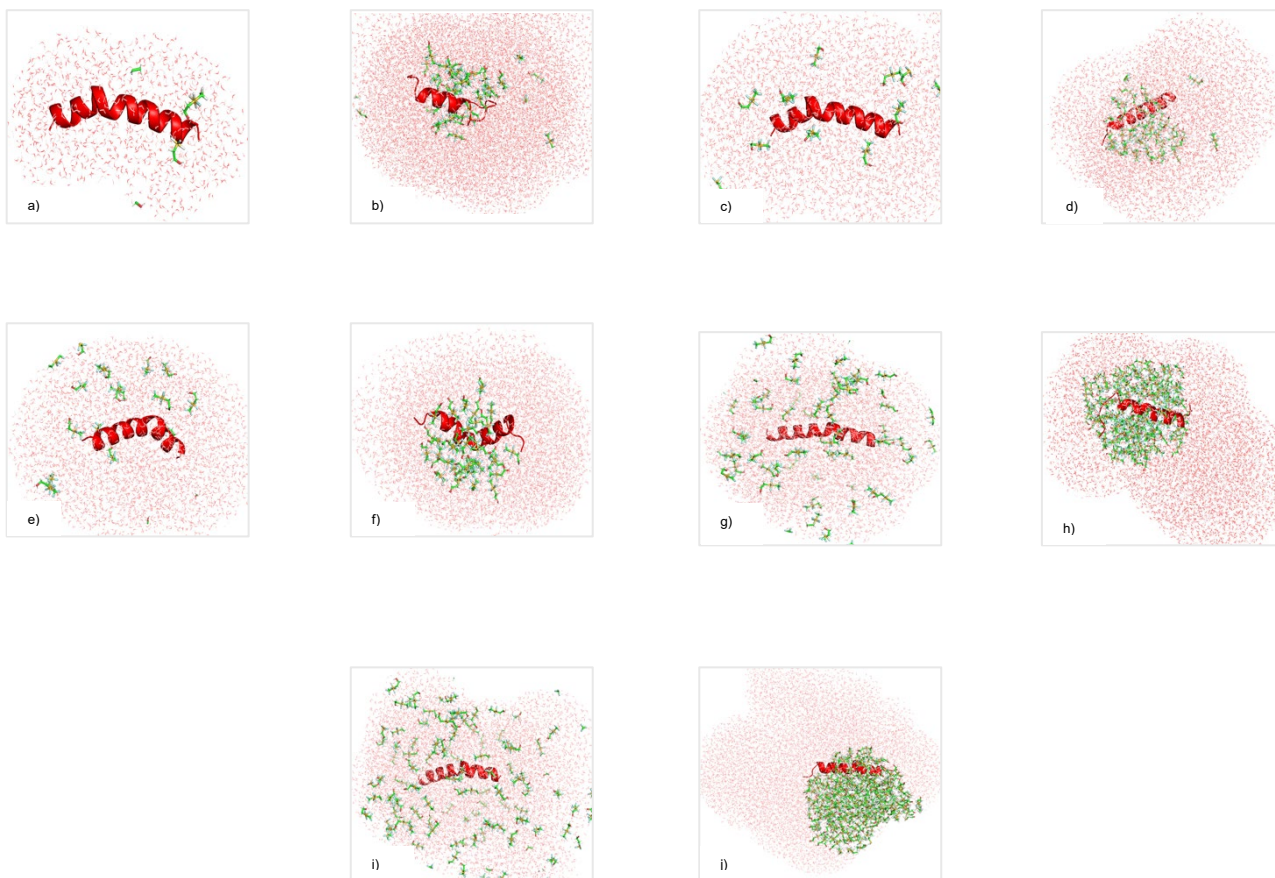

Figure S5. Representative snapshot of simulation within 0.6 nm from the melittin (MLT) backbone in  $\text{CF}_3\text{SF}_4$ -ethanol-water system. PDB: 2MLT of melittin at 0.5 % (a), 1 % (c), 2.5 % (e), 4.5 % (g), and 6 % (i) of  $\text{CF}_3\text{SF}_4$ -ethanol-water system at the beginning of simulation.  $\alpha$ -helix of melittin after 50 ns simulation in 0.5 % (b), 1 % (d), 2.5 % (f), 4.5 % (h), and 6 % (j)  $\text{CF}_3\text{SF}_4$ -ethanol-water system.



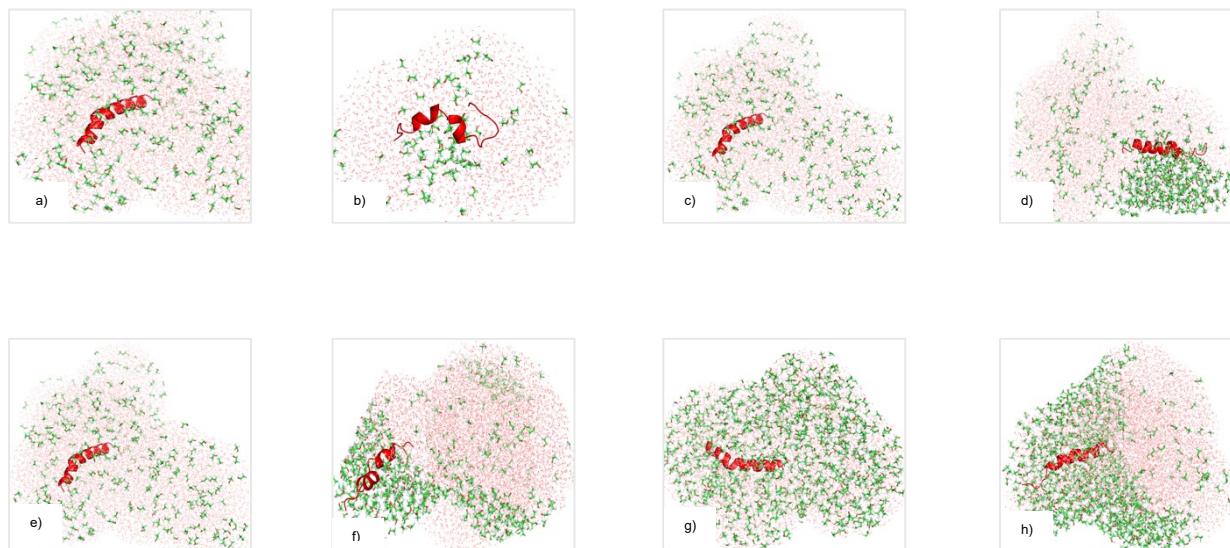

Figure S6. Representative snapshot of simulation within 0.6 nm from the melittin (MLT) backbone in TFE-water system. PDB: 2MLT of melittin at 8 % (a), 10 % (c), 20 % (e), and 30 % (g) TFE-water system at the beginning of simulation.  $\alpha$ -helix of melittin after 50 ns simulation in 8 % (b), 10 % (d), 20 % (f), and 30 % (h) TFE-water system.

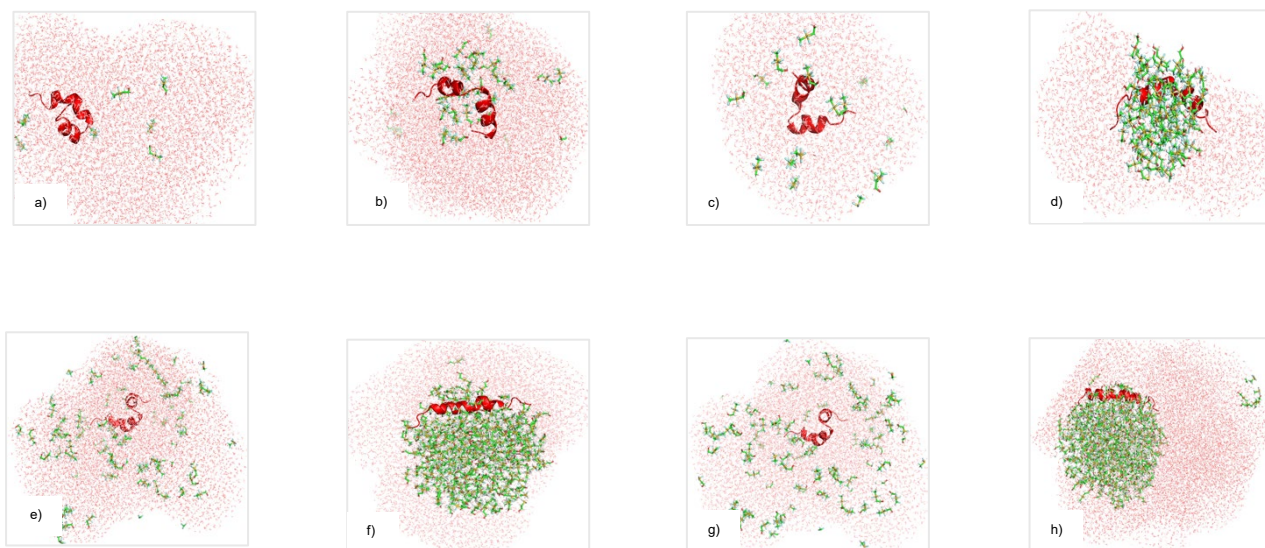

Figure S7. Representative snapshot of simulation within a distance of 0.6 nm from the melittin (RMLT) backbone in CF<sub>3</sub>SF<sub>4</sub>-ethanol-water system. Random coil structure of melittin at the beginning of simulation at 0.5 % (a) , 2.5 % (c) , 4.5 % (e) , and 6 %.

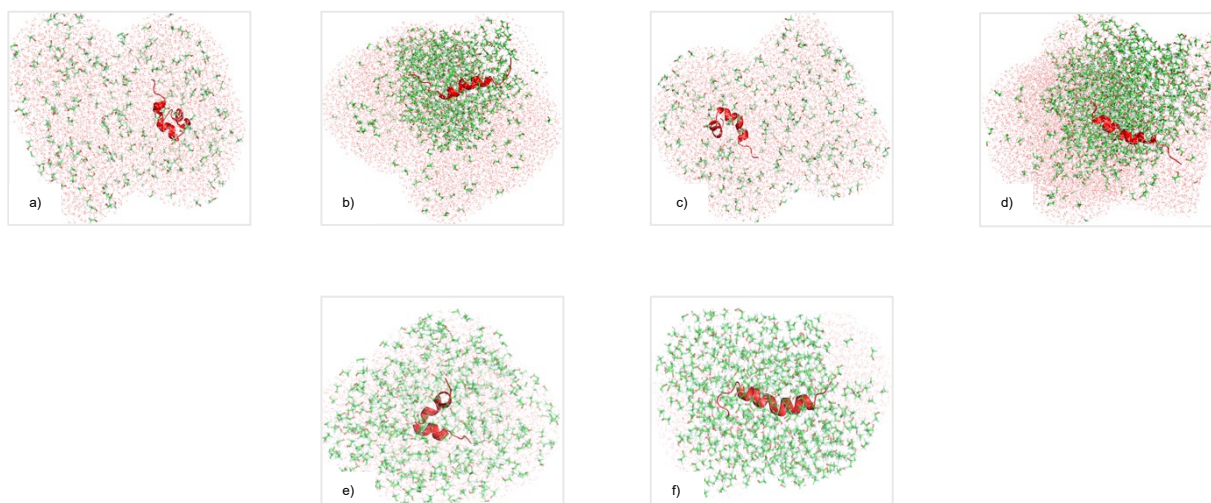

Figure S8. Representative snapshot of simulation within 0.6 nm from the melittin (RMLT) backbone in TFE-water system. Random coil structure of melittin at 10 % (a), 20 % (c), and 30 % (e) TFE-water system at the beginning of simulation.  $\alpha$ -helix of melittin after 50 ns simulation in 10 % (b), 20 % (d) and 30 % (f) TFE-water system.

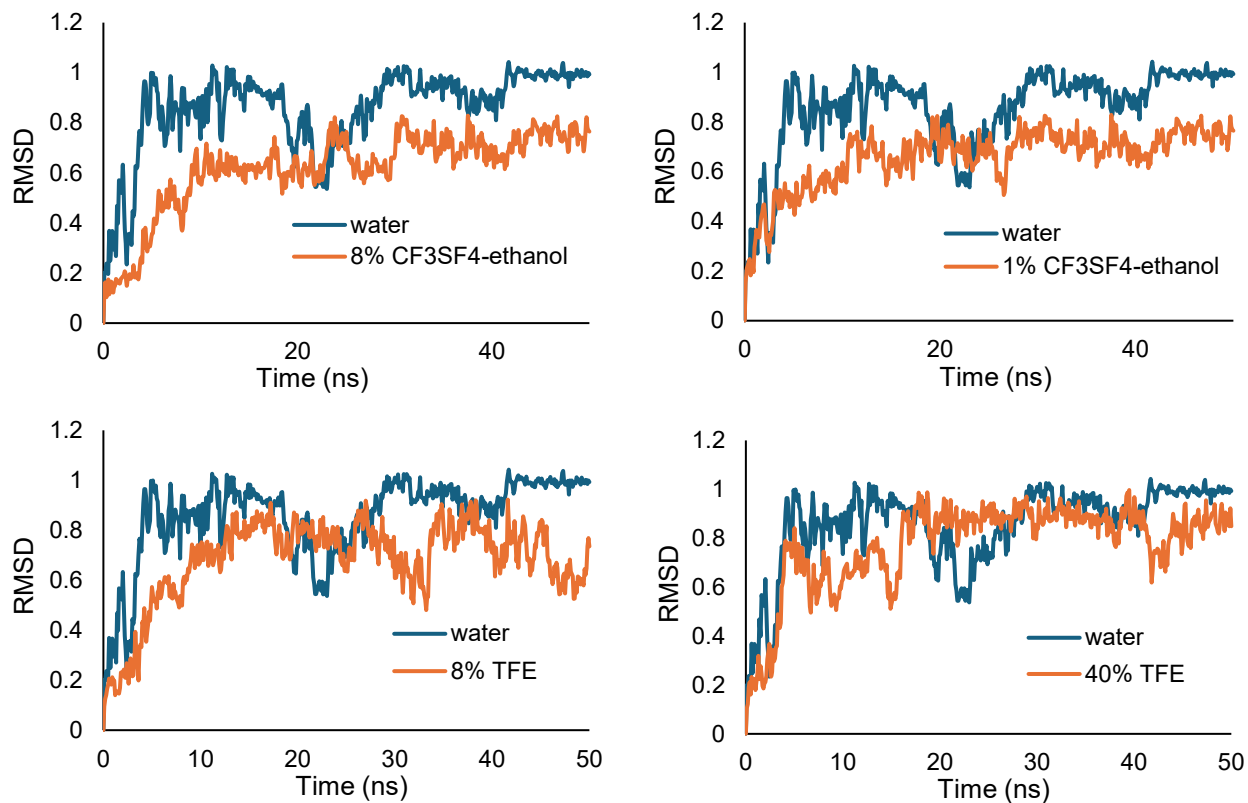

**Figure S9.** Backbone RMSD with respect to the initial simulated structure RMLT in 1%, 8% CF<sub>3</sub>SF<sub>4</sub>-ethanol-water and 8% and 40% TFE-water system for 50 ns simulation time.

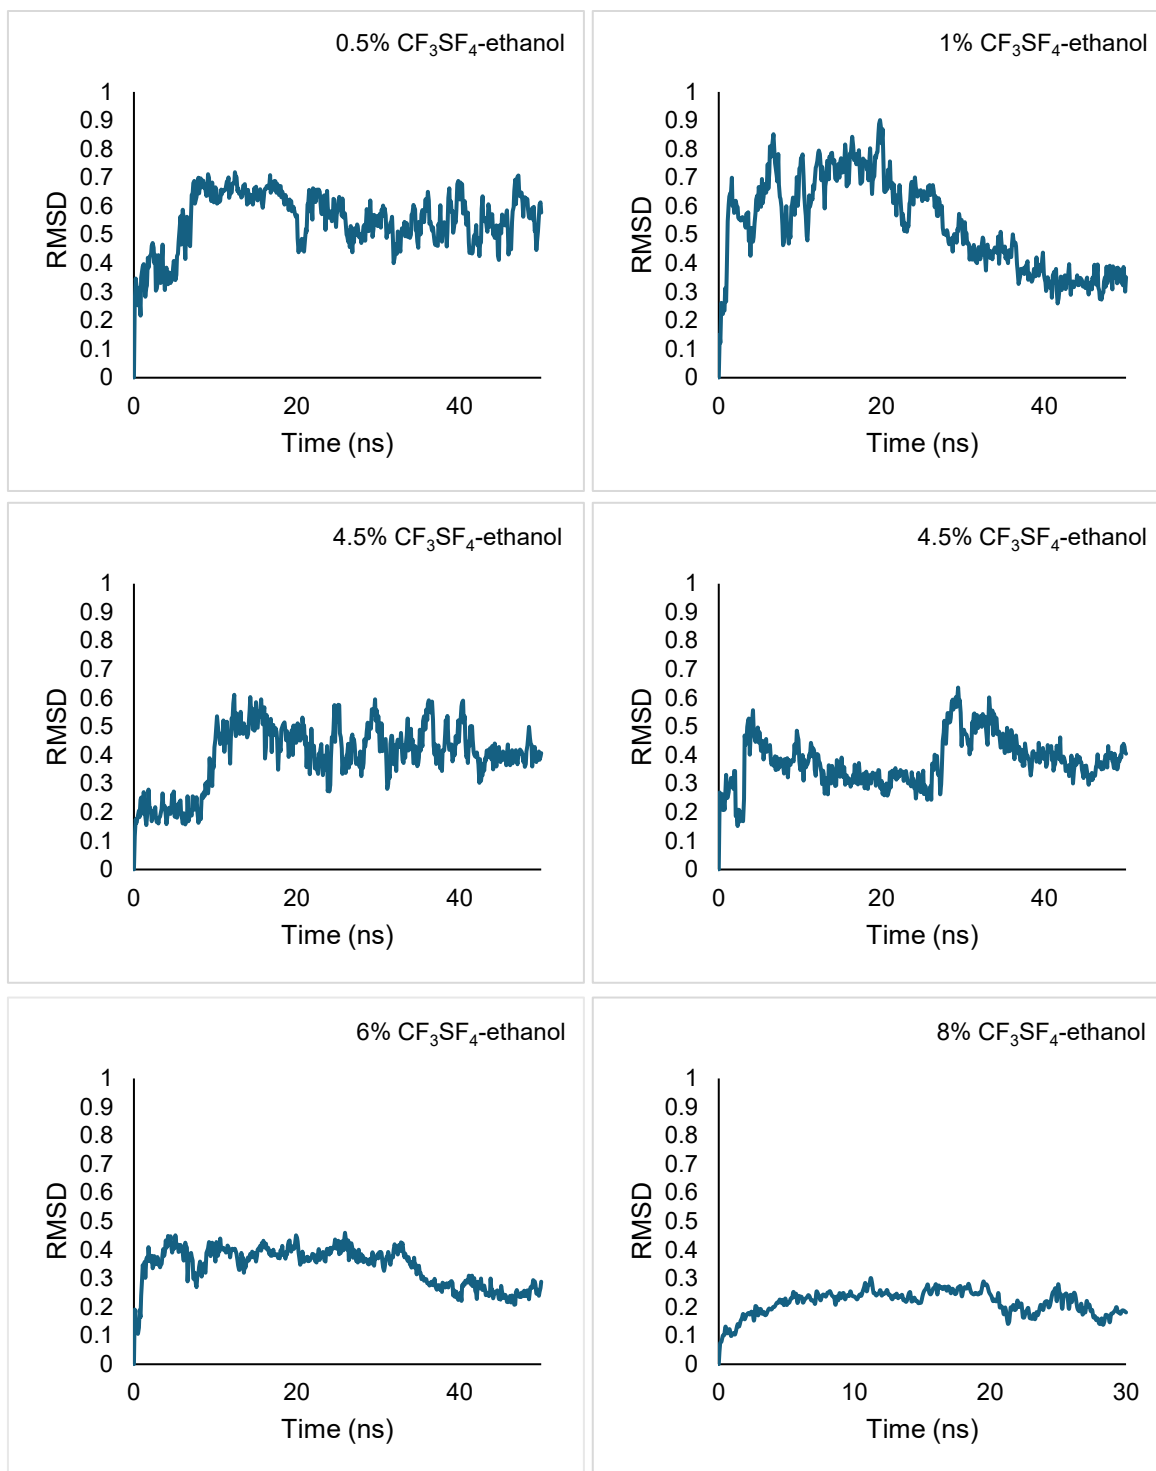

Figure S10. Backbone RMSD with respect to the initial structure of simulation of melittin (MLT) in  $\text{CF}_3\text{SF}_4$ -ethanol for different concentrations.

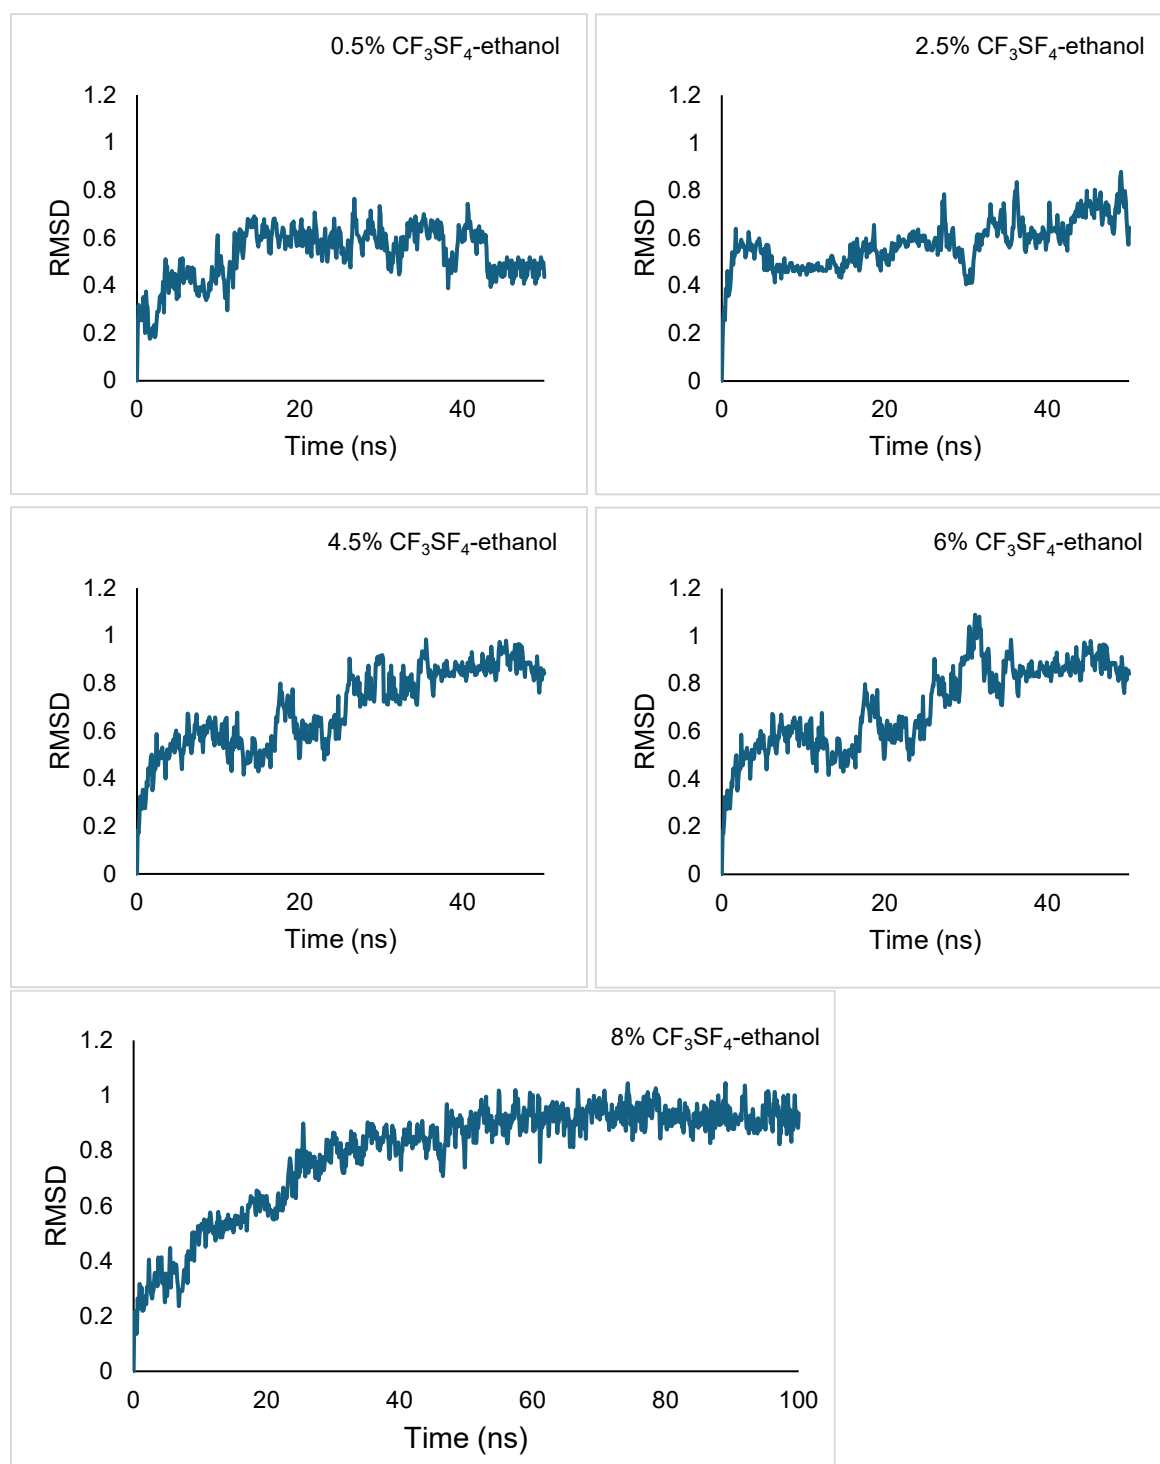

Figure S11. Backbone RMSD with respect to the initial structure of simulation of melittin (RMLT) in  $\text{CF}_3\text{SF}_4$ -ethanol for different concentrations.

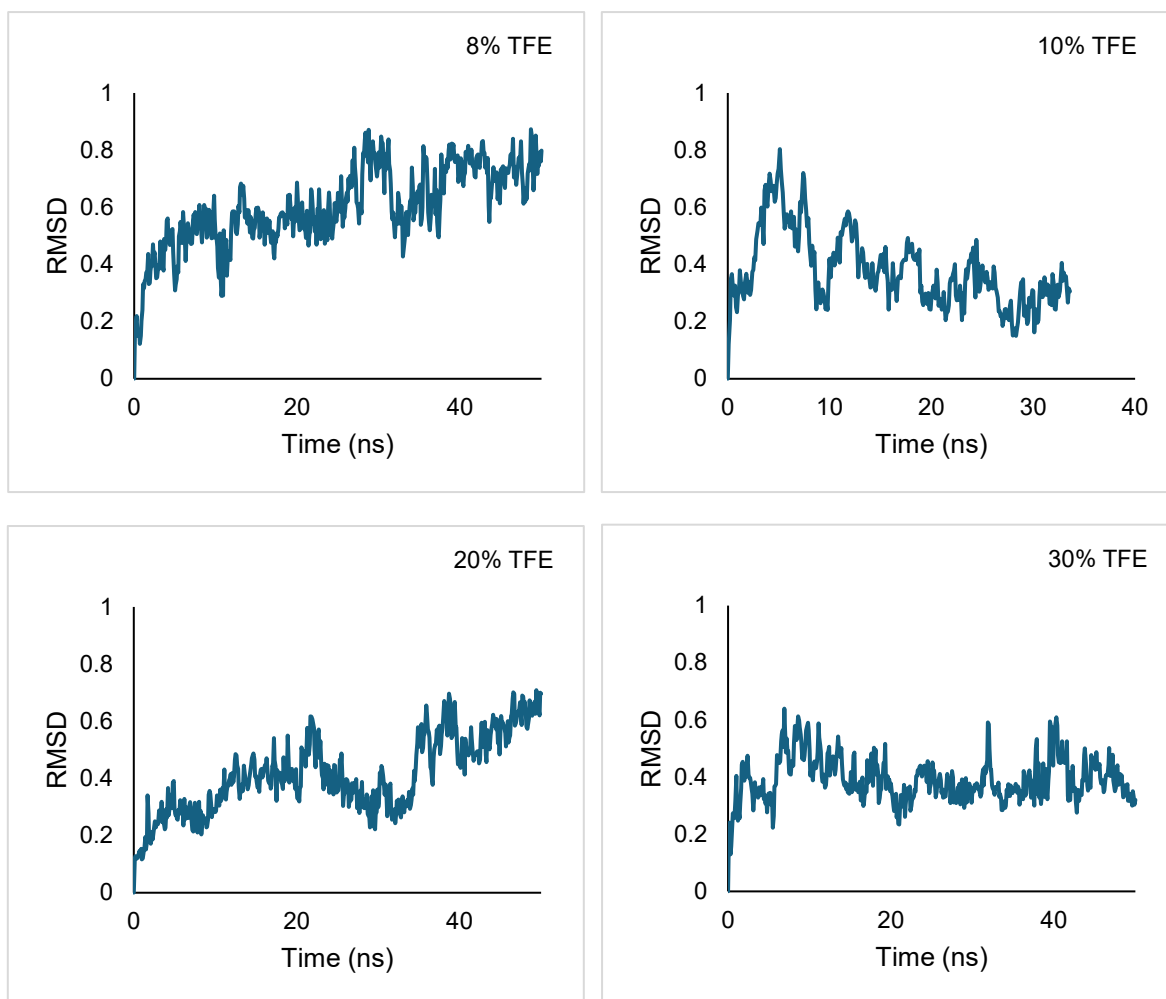

Figure S12. Backbone RMSD with respect to the initial structure of simulation of melittin (MLT) in TFE for different concentrations.

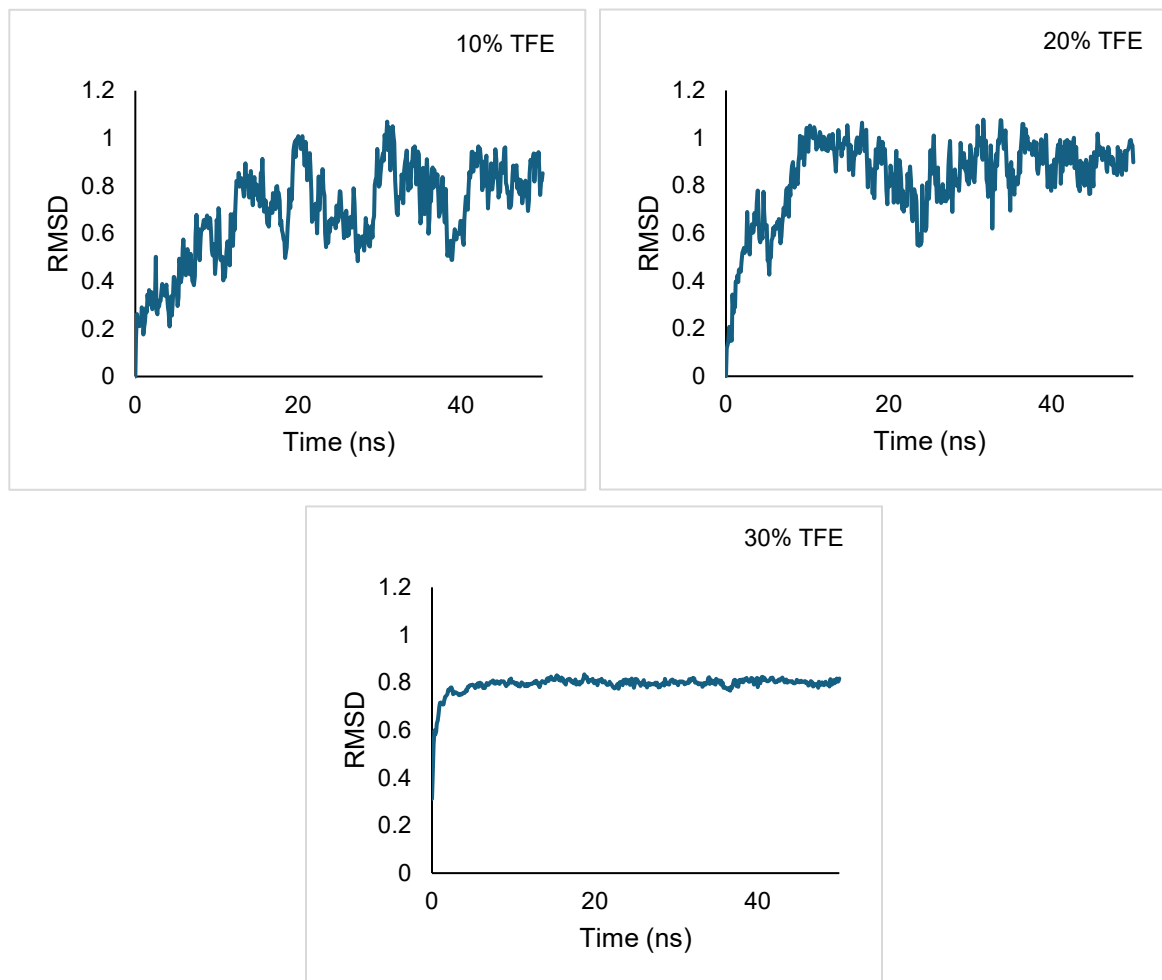

Figure S13. Backbone RMSD with respect to the initial structure of simulation of melittin (RMLT) in TFE for different concentrations.



<https://youtu.be/-fC3mkvGhSI>

Figure S14. Folding of RMLT in 8% CF<sub>3</sub>SF<sub>4</sub>-ethanol from 50 ns simulation.

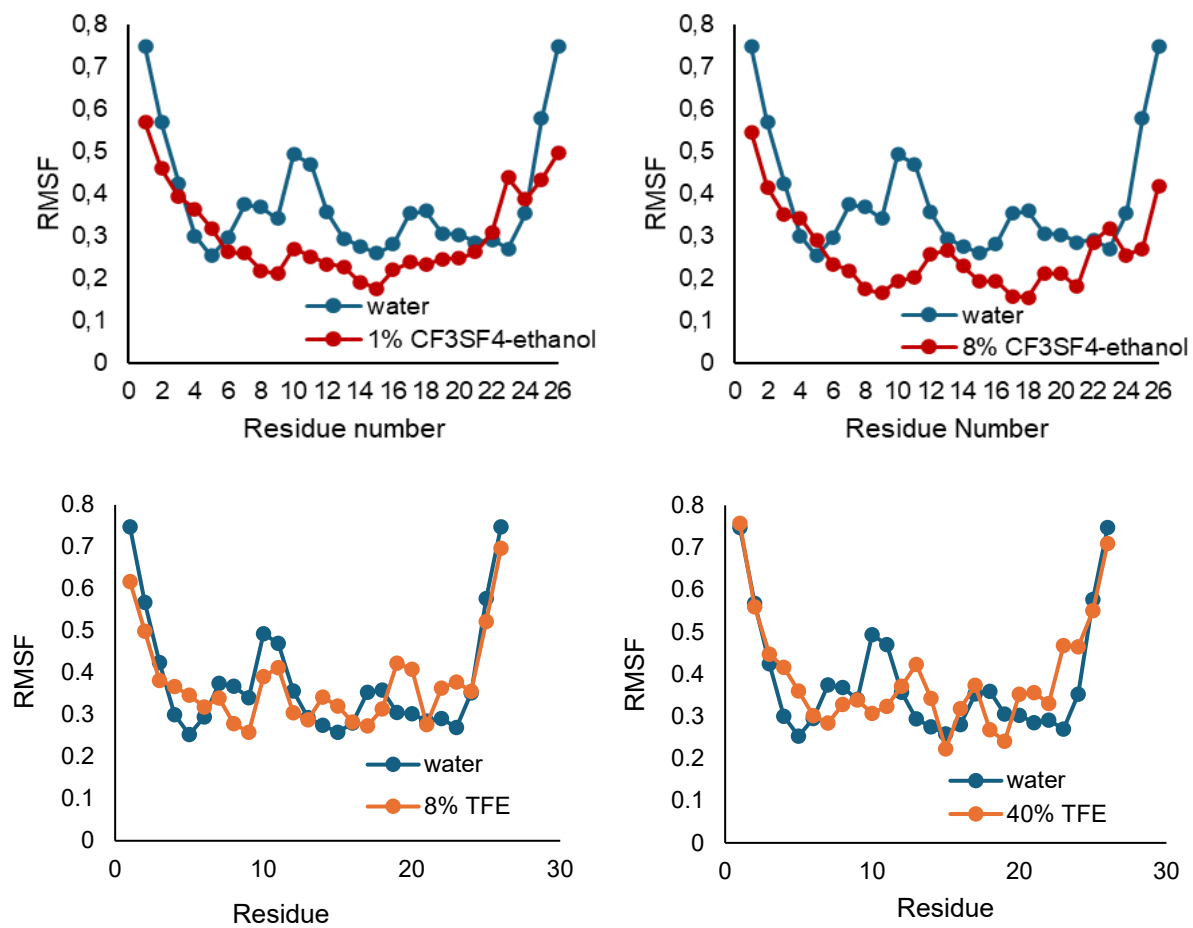

Figure S15. Backbone RMSF with respect to the structure RMLT in 1%, 8% CF<sub>3</sub>SF<sub>4</sub>-ethanol-water and 8% and 40% TFE-water system with respect to residue number.

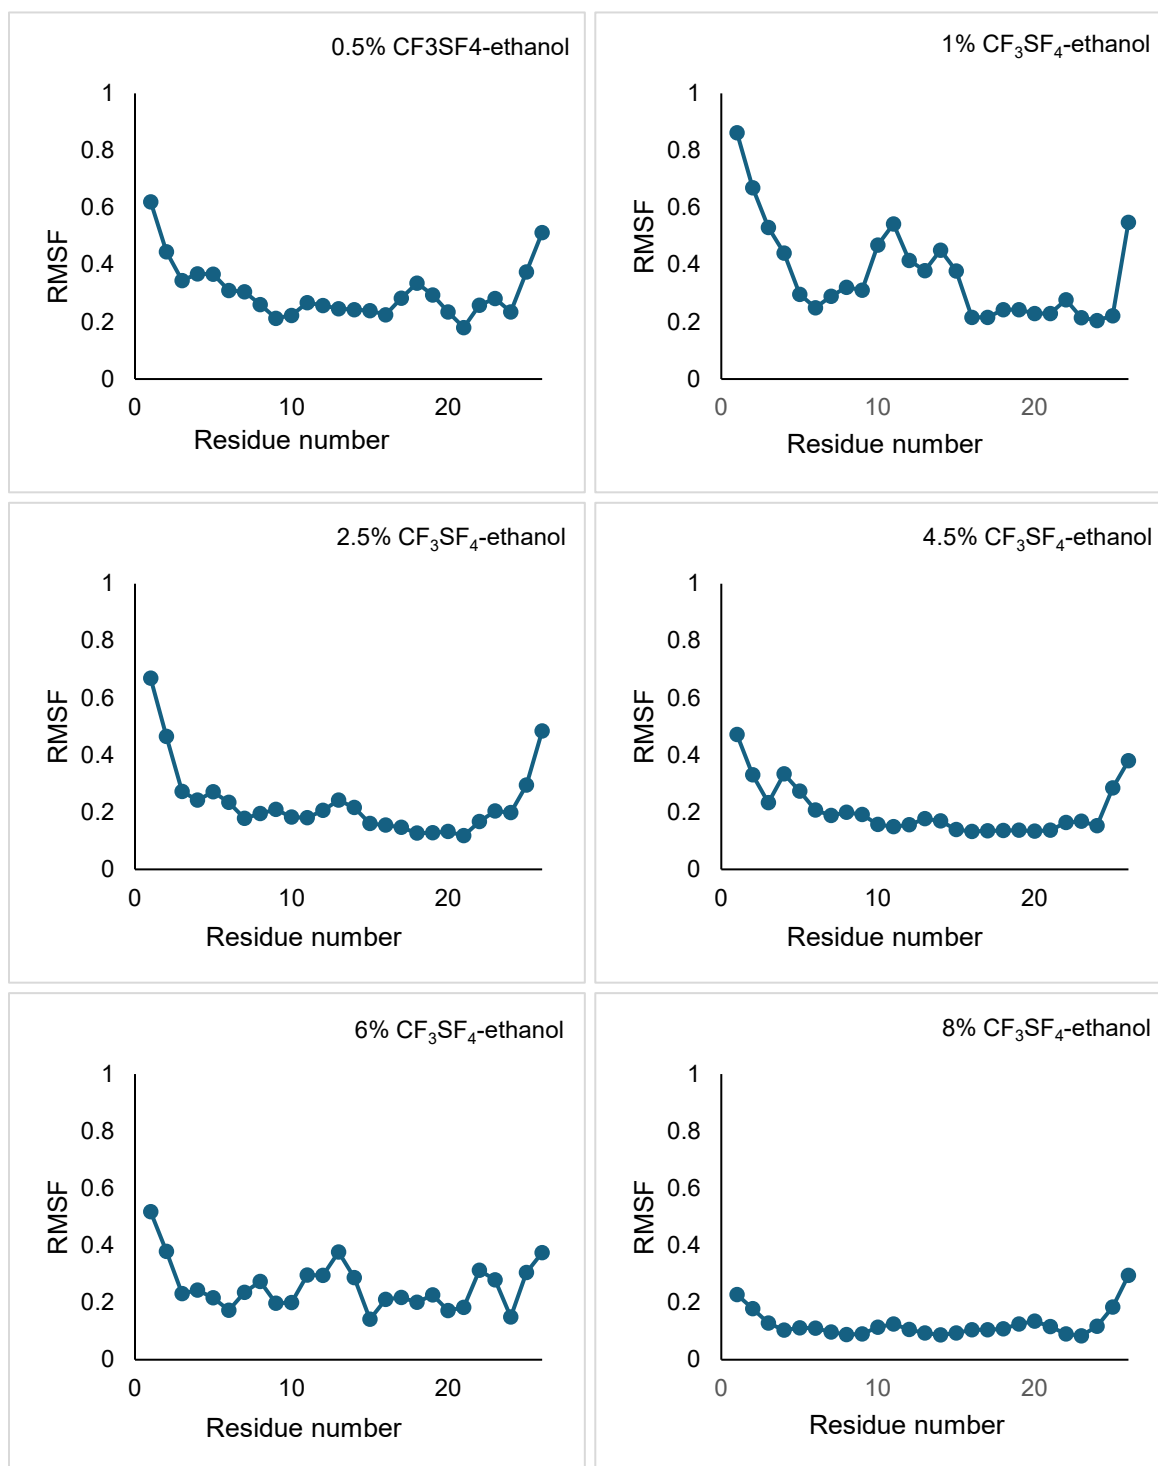

Figure S16. Backbone RMSF with respect to the initial structure of simulation of melittin (MLT) in  $\text{CF}_3\text{SF}_4$ -ethanol for different concentrations.

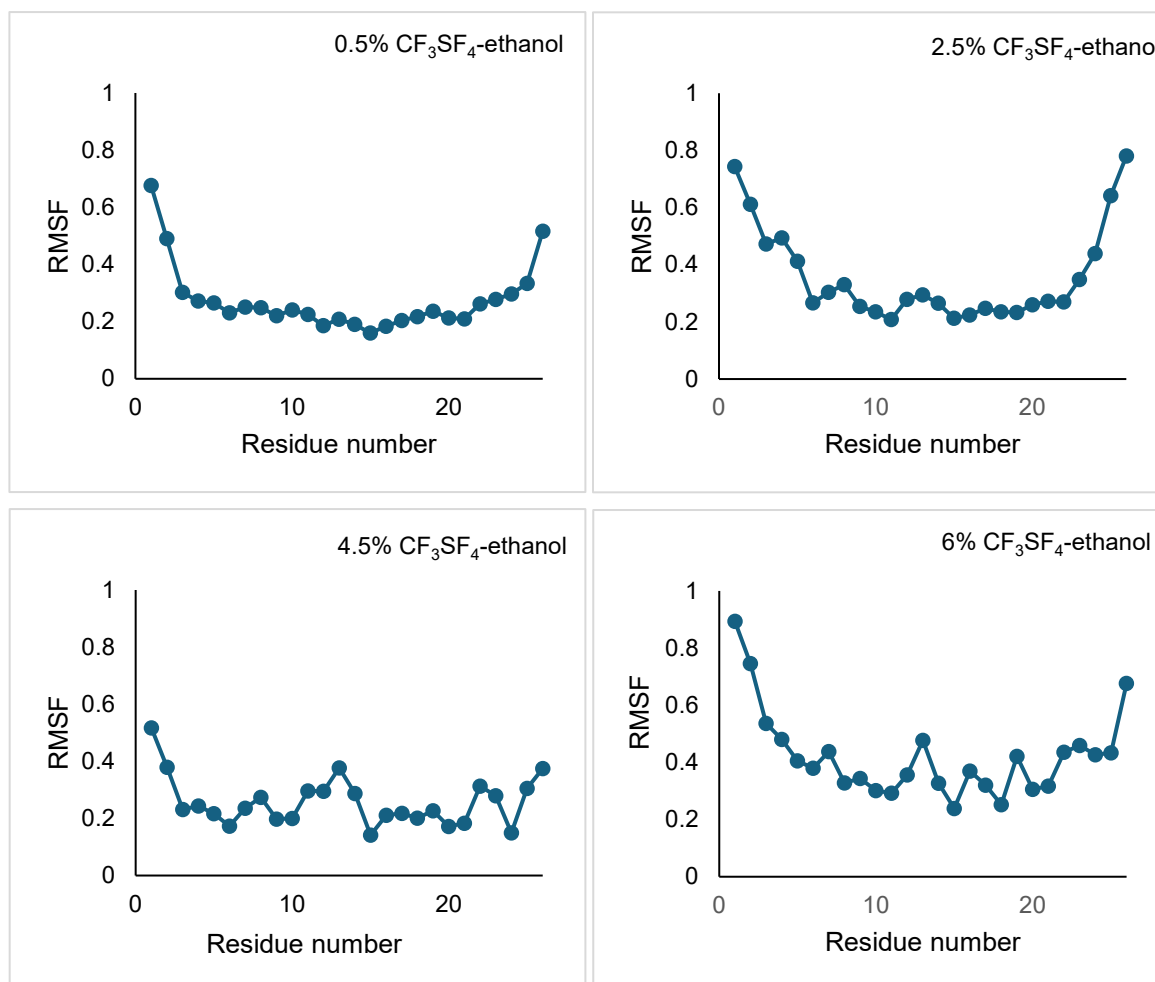

Figure S17. Backbone RMSF with respect to the initial structure of simulation of melittin (RMLT) in  $\text{CF}_3\text{SF}_4$ -ethanol for different concentrations.

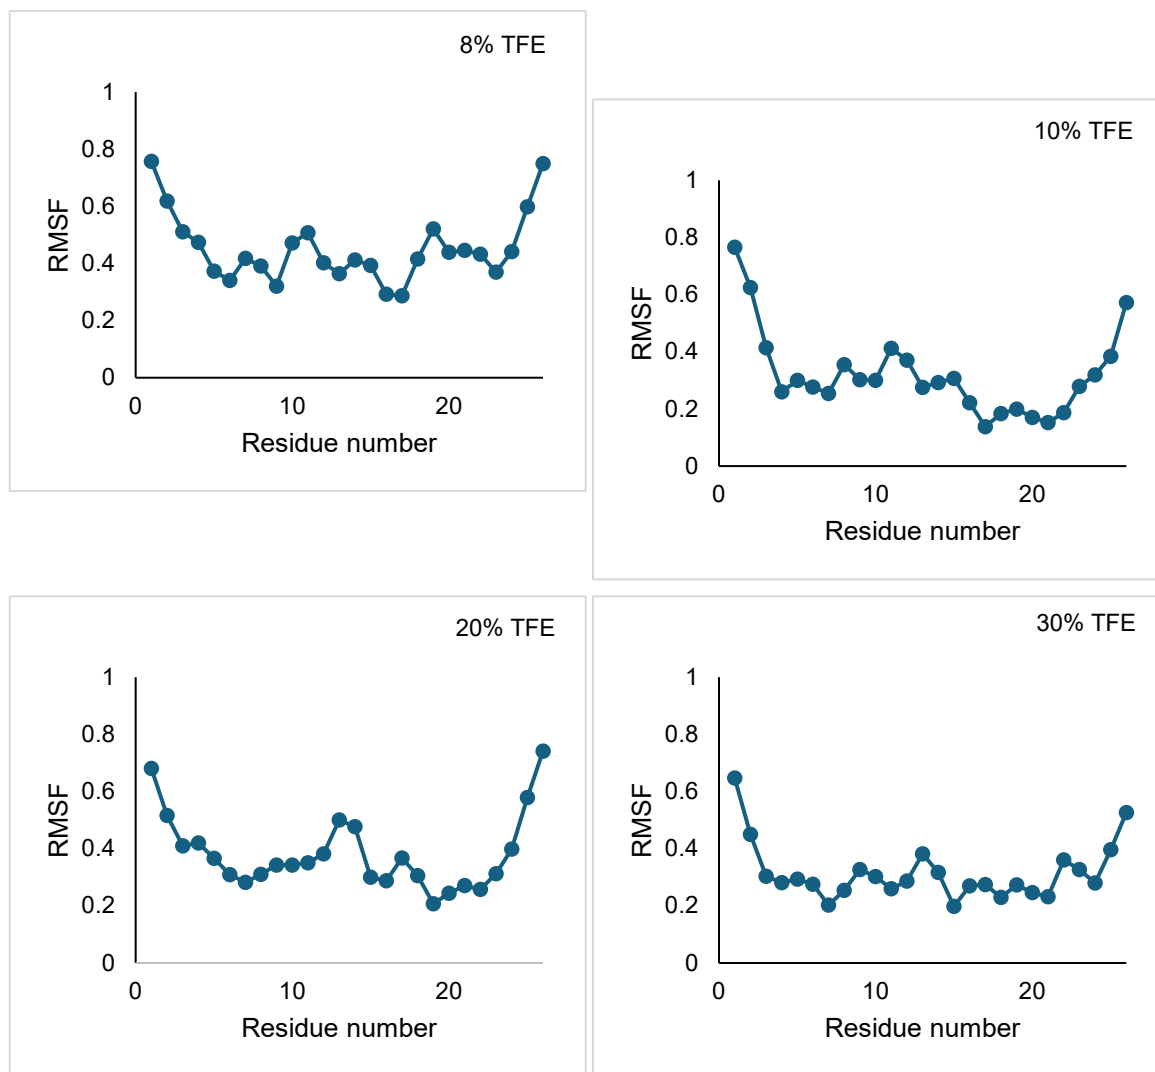

Figure S18. Backbone RMSF with respect to the initial structure of simulation of melittin (MLT) in TFE for different concentrations.

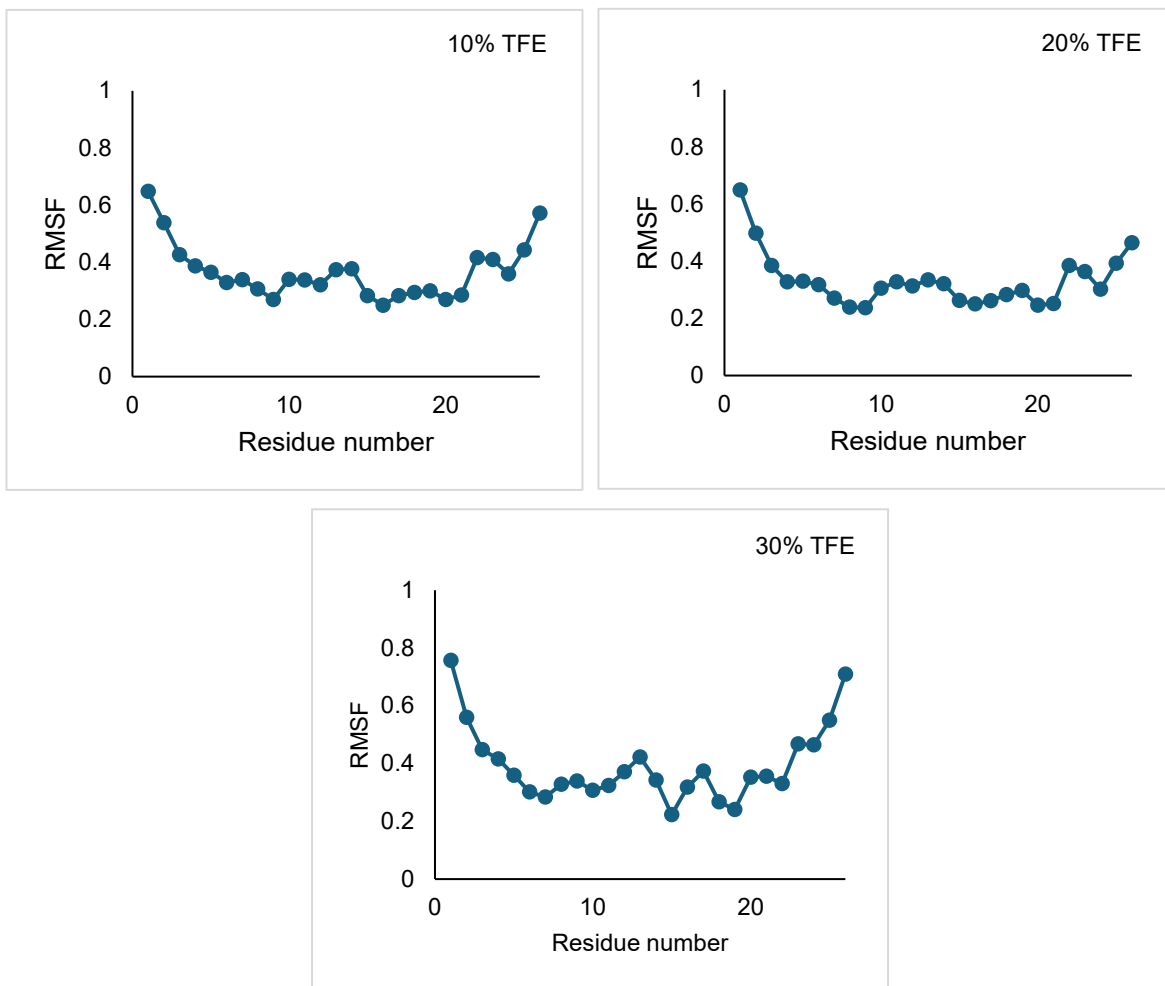

Figure S19. Backbone RMSF with respect to the initial structure of simulation of melittin (RMLT) in TFE for different concentrations.

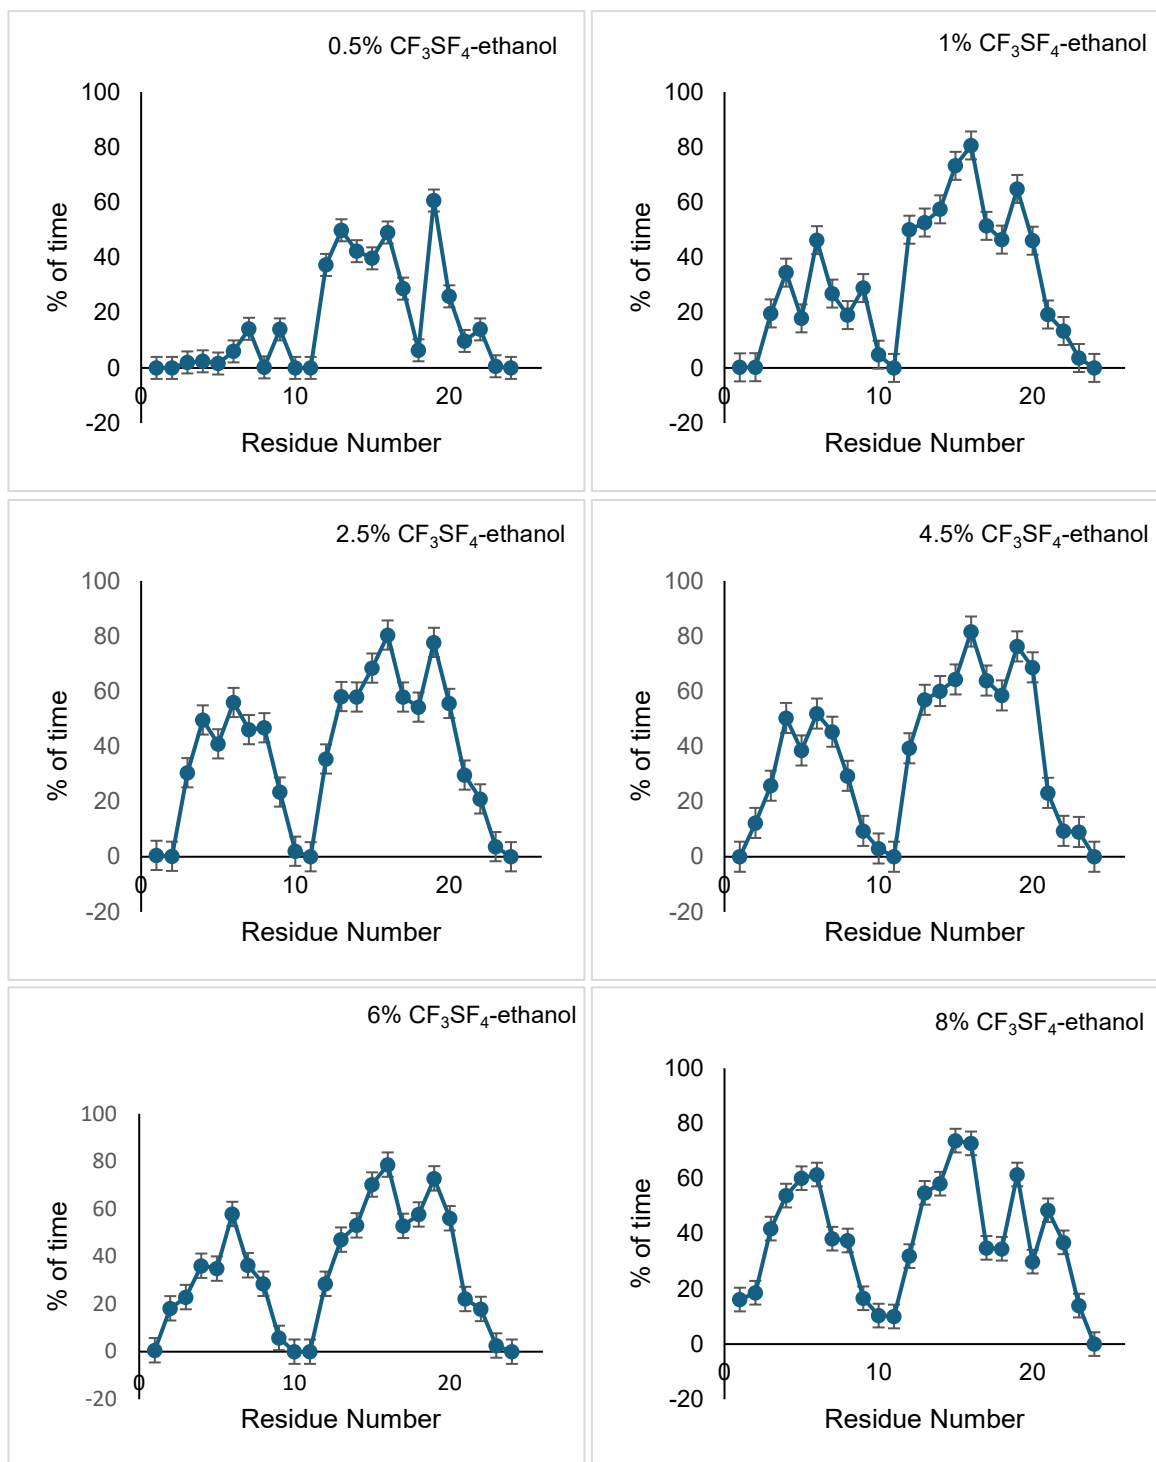

Figure S20. Helicity per residue with respect to % of time of melittin (MLT) in  $\text{CF}_3\text{SF}_4$ -ethanol for different concentrations.

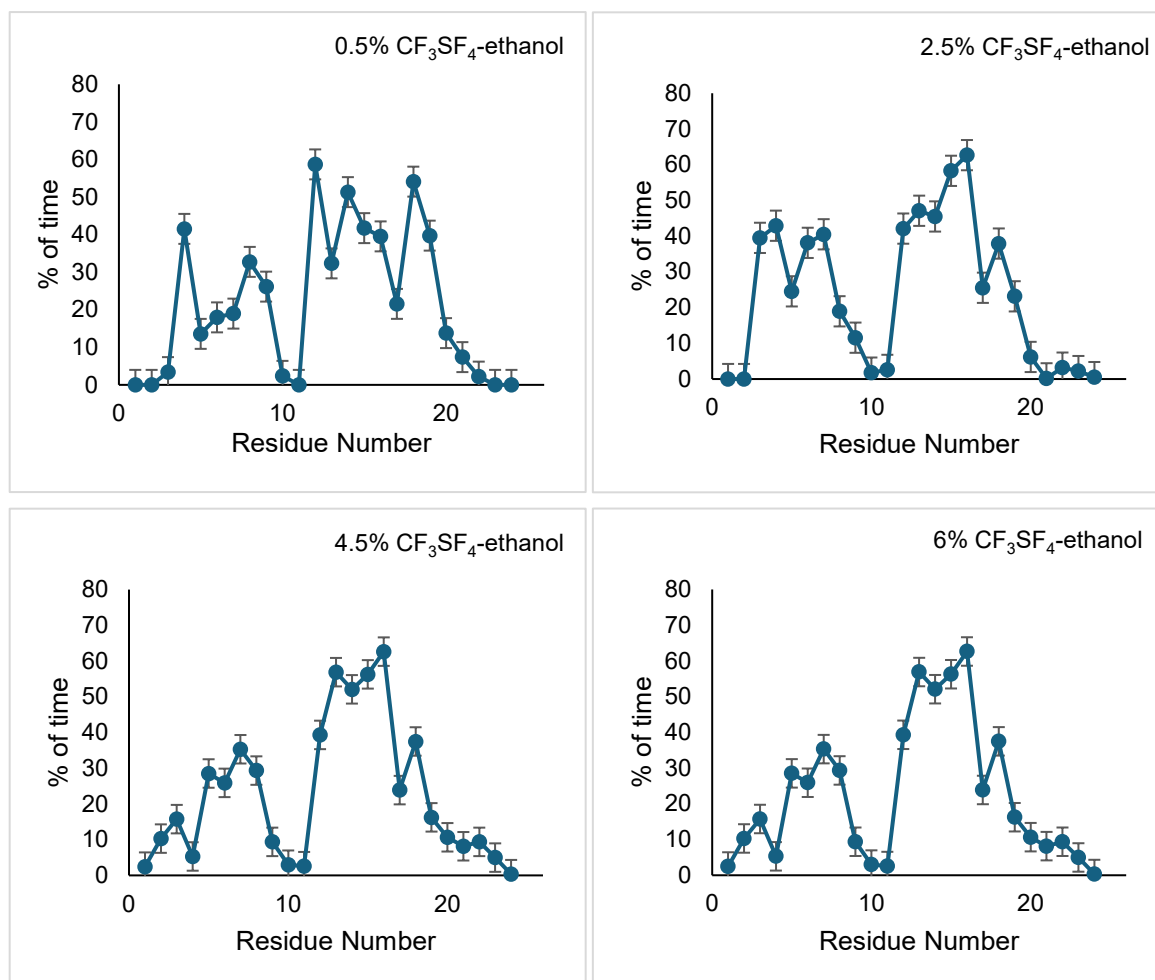

Figure S21. Helicity per residue with respect to % of time of melittin (RMLT) in CF<sub>3</sub>SF<sub>4</sub>-ethanol for different concentrations.



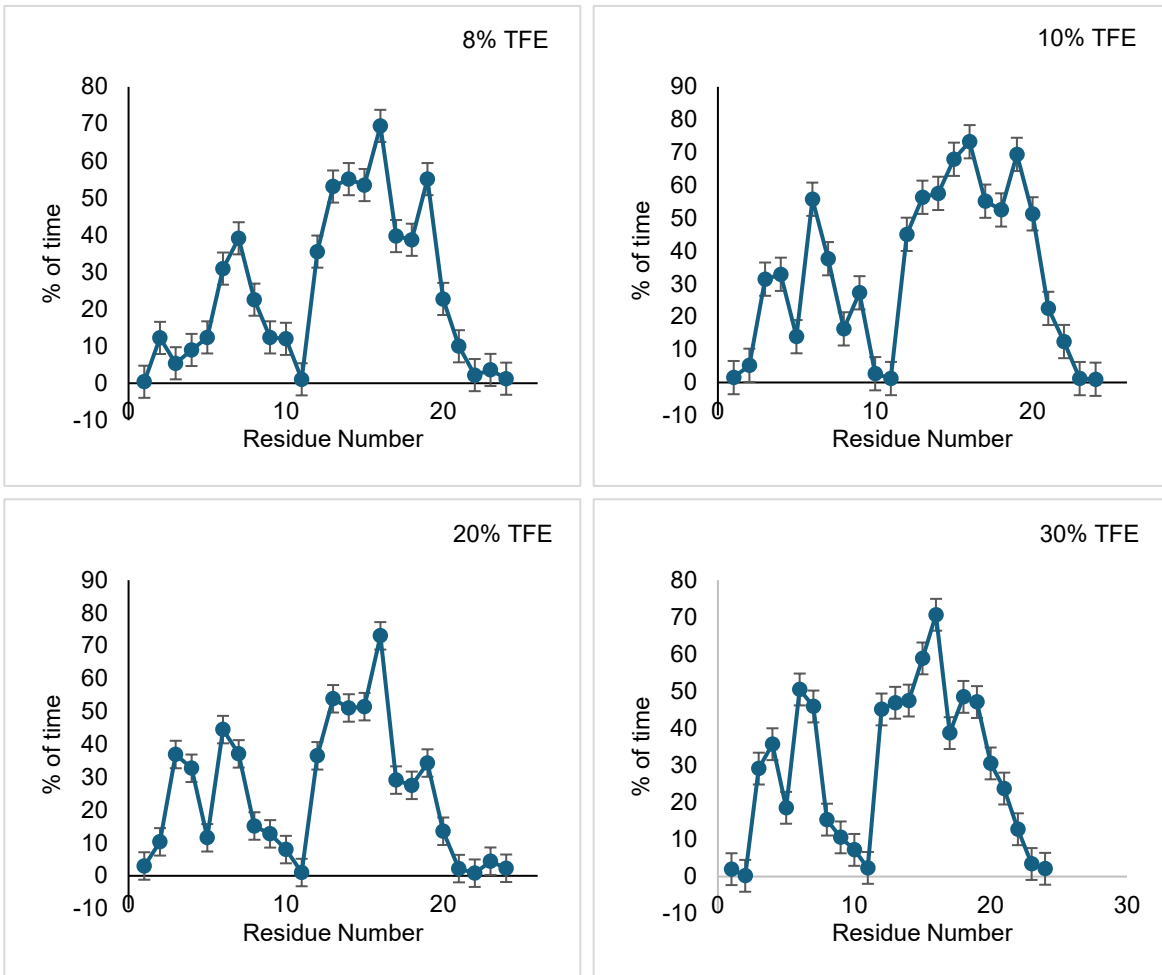

Figure S22. Helicity per residue with respect to % of time of melittin (MLT) in TFE for different concentrations.

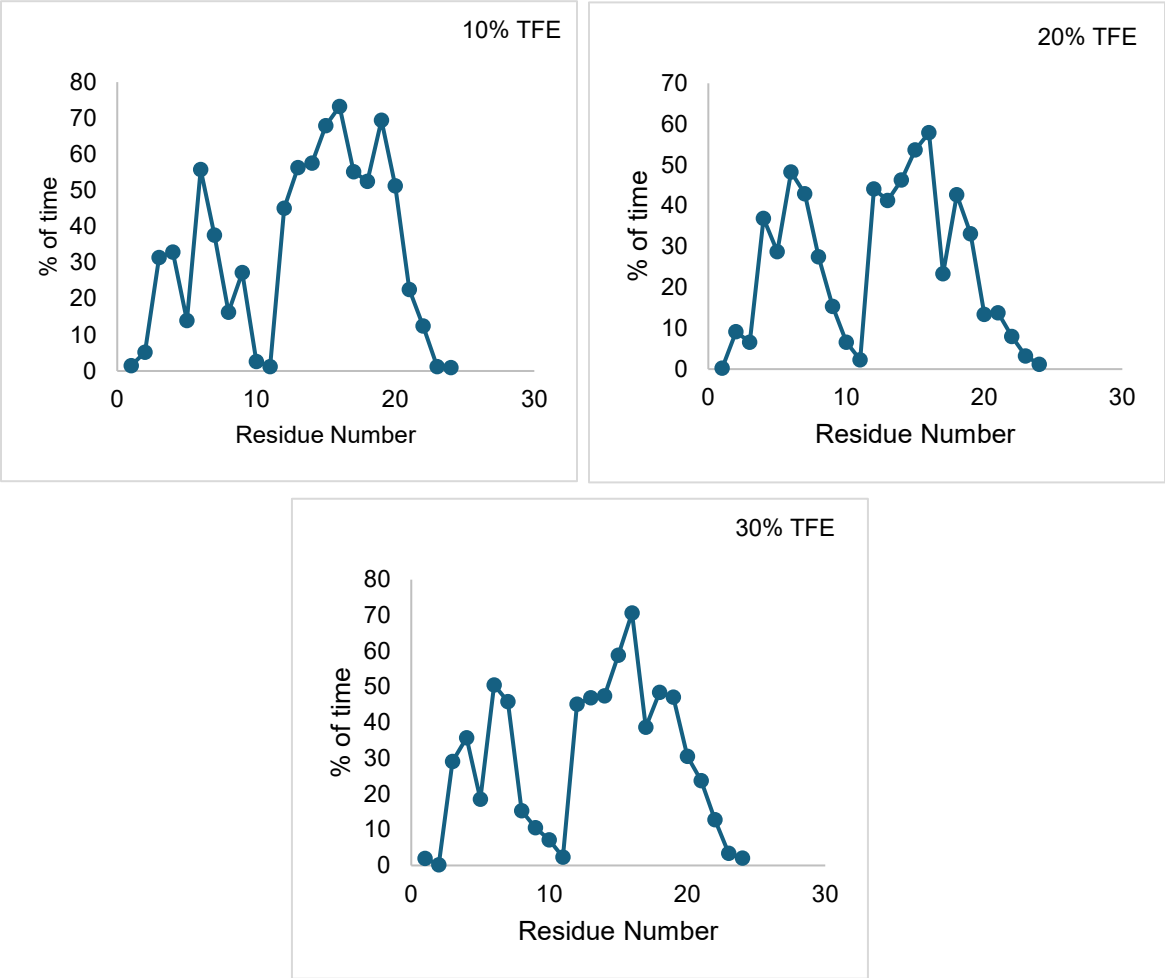

Figure S23. Helicity per residue with respect to % of time of melittin (RMLT) in TFE for different concentrations.

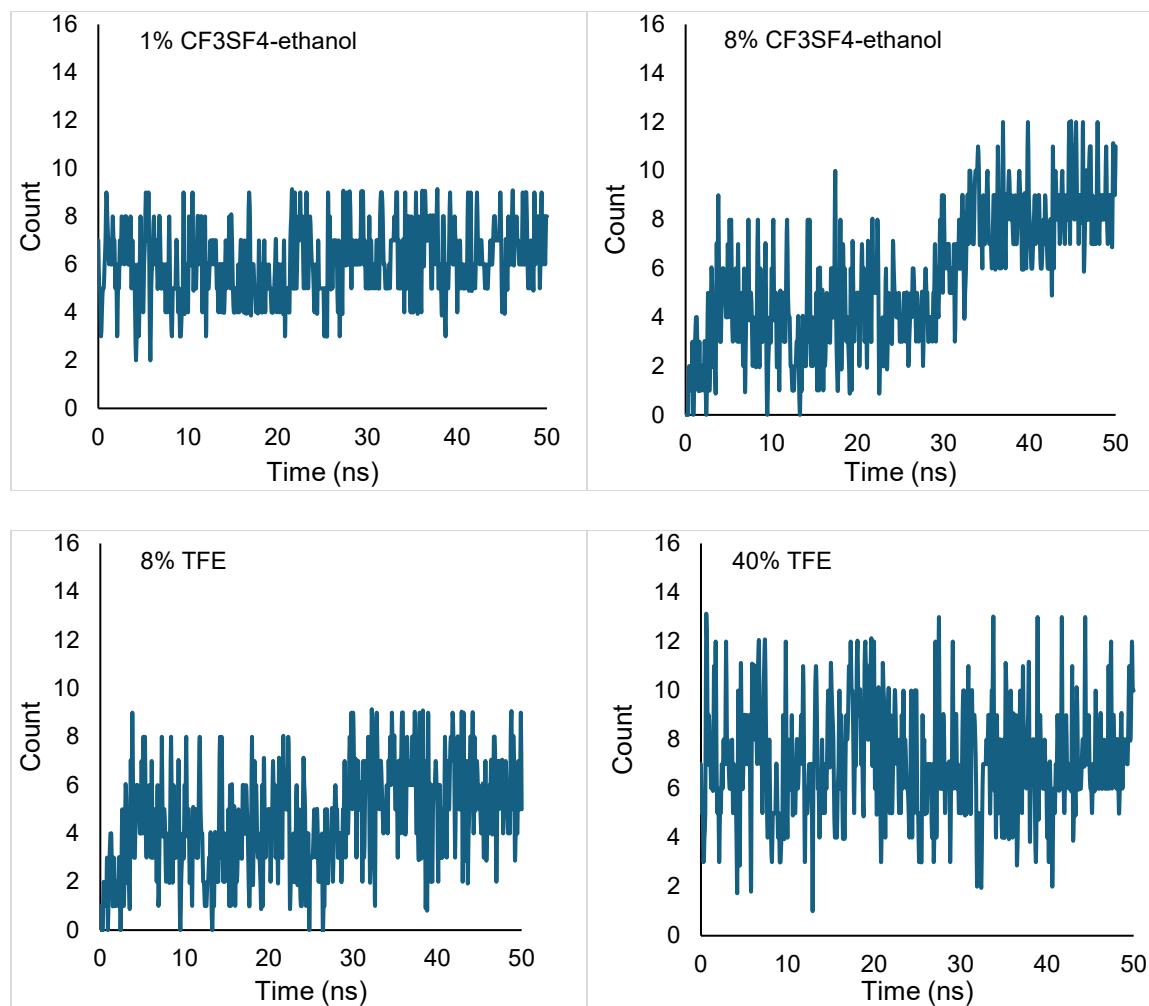

Figure. S24. Intermolecular hydrogen bonding interactions between the alcohols and the peptide over the period of the simulations.
